# Supplementary material for: Involvement of TOB1 on autophagy in gastric cancer AGS cells via decreasing the activation of AKT/mTOR signaling pathway
Source: PeerJ. 2022 Feb 4;10:e12904. doi: 10.7717/peerj.12904 (PMC8820212; doi:10.7717/peerj.12904)
Supplement: Supplemental Information 2 [file peerj-10-12904-s002.xls]

## Sheet: Sheet1
1	Dataset: The raw numbers for Figure 1 (WB)
Fig.1A-B	Group	TOB1	β-actin	TOB1/β-actin	Normalized
	72h control	24793	1230095	0.0201554	1
	72h TOB1	185972	1301363	0.142906	7.0902
	48h control	17518	1142759	0.0153296	1
	48h TOB1	124129	1257192	0.0987351	6.44083
Repeat	Group	TOB1	β-actin	TOB1/β-actin	Normalized
	72h control	30565	36476	0.837948	1
	72h TOB1	48187	39753	1.21216	1.44658
	48h control	32923	43279	0.760715	1
	48h TOB1	34263	41774	0.820199	1.07819
	72h control	39466	43765	0.901771	1
	72h TOB1	52422	43381	1.20841	1.34004
	48h control	28221	48709	0.57938	1
	48h TOB1	30143	48493	0.621595	1.07286
Fig.1A	Group	Gene	RawIntDen	Gene/β-actin	LC3II/LC3I	Normalized	LC3II/β-actin	Normalized
	48h Control	LC3I	20356	0.0354326
	48h Control	LC3II	49715	0.0865363	2.44228	1	0.0865363	1
	48h TOB1	LC3I	80360	0.124293
	48h TOB1	LC3II	270649	0.418612	3.36796	1.37902	0.418612	4.83742
	48h Control	β-actin	574499
	48h TOB1	β-actin	646539
Repeat	Group	Gene	RawIntDen	Gene/β-actin	LC3II/LC3I	Normalized	LC3II/β-actin	Normalized
	48h Control	LC3I	868637	0.898634
	48h Control	LC3II	568098	0.587717	0.654011	1	0.587717	1
	48h TOB1	LC3I	970212	0.911452
	48h TOB1	LC3II	823439	0.773569	0.848721	1.29772	0.773569	1.31623
	48h Control	β-actin	966619
	48h TOB1	β-actin	1064468
	Group	Gene	RawIntDen	Gene/β-actin	LC3II/LC3I	Normalized	LC3II/β-actin	Normalized
	48h Control	LC3I	189948	2.86519
	48h Control	LC3II	263595	3.97609	1.38772	1	3.97609	1
	48h TOB1	LC3I	158366	2.02129
	48h TOB1	LC3II	355079	4.53202	2.24214	1.6157	4.53202	1.13982
	48h Control	β-actin	66295
	48h TOB1	β-actin	78349
Fig.1B	Group	Gene	RawIntDen	Gene/β-actin	LC3II/LC3I	Normalized	LC3II/β-actin	Normalized
	72h Control	LC3I	44666	0.0750603
	72h Control	LC3II	83141	0.139717	1.86139	1	0.139717	1
	72h TOB1	LC3I	105431	0.178597
	72h TOB1	LC3II	238448	0.403924	2.26165	1.21503	0.403924	2.89102
	72h Control	β-actin	595068
	72h TOB1	β-actin	590329
Repeat	Group	Gene	RawIntDen	Gene/β-actin	LC3II/LC3I	Normalized	LC3II/β-actin	Normalized
	72h Control	LC3I	325040	0.142544
	72h Control	LC3II	565438	0.247968	1.7396	1	0.247968	1
	72h TOB1	LC3I	323564	0.132434
	72h TOB1	LC3II	599394	0.245331	1.85247	1.06489	0.245331	0.989364
	72h Control	β-actin	2280283
	72h TOB1	β-actin	2443205
	Group	Gene	RawIntDen	Gene/β-actin	LC3II/LC3I	Normalized	LC3II/β-actin	Normalized
	72h Control	LC3I	625054	9.77732
	72h Control	LC3II	233691	3.65548	0.373873	1	3.65548	1
	72h TOB1	LC3I	179375	3.39256
	72h TOB1	LC3II	262410	4.96302	1.46291	3.91286	4.96302	1.3577
	72h Control	β-actin	63929
	72h TOB1	β-actin	52873
2	Dataset: The raw numbers for Figure 2 ( sequencing data)
	GEPIA	http://gepia2.cancer-pku.cn/#correlation
		http://gepia2.cancer-pku.cn/#dataset
3	Dataset: The raw numbers for Figure 5 (WB)
Fig.5A	Group	Gene	RawIntDen	Gene/β-actin	Normalized
	72h Control	AKT	687833	2.61103	1
	72h TOB1	AKT	625849	2.4896	0.953496
	72h Control	p-AKT	70219	0.266553	1
	72h TOB1	p-AKT	35868	0.142682	0.535285
	72h Control	β-actin	263434
	72h TOB1	β-actin	251385
Repeat	Group	Gene	RawIntDen	Gene/β-actin	Normalized
	72h Control	AKT	2779432	1.21402	1
	72h TOB1	AKT	3016641	0.803827	0.662122
	72h Control	p-AKT	2350873	1.02683	1
	72h TOB1	p-AKT	1089006	0.290181	0.2826
	72h Control	β-actin	2289451
	72h TOB1	β-actin	3752848
	Group	Gene	RawIntDen	Gene/β-actin	Normalized
	72h Control	AKT	3032006	8.91452	1
	72h TOB1	AKT	2662965	6.88082	0.771866
	72h Control	p-AKT	2204209	6.48068	1
	72h TOB1	p-AKT	1667678	4.3091	0.664915
	72h Control	β-actin	340120
	72h TOB1	β-actin	387013
Fig.5B	Group	Gene	RawIntDen	Gene/β-actin	Normalized
	72h Control	mTOR	5517972	6.80967	1
	72h TOB1	mTOR	5041311	6.37821	0.93664
	72h Control	p-mTOR	6569614	8.10749	1
	72h TOB1	p-mTOR	3607448	4.5641	0.562949
	72h Control	β-actin	810314
	72h TOB1	β-actin	790396
Repeat	Group	Gene	RawIntDen	Gene/β-actin	Normalized
	72h Control	mTOR	7007255	18.7154	1
	72h TOB1	mTOR	10026682	29.8228	1.59349
	72h Control	p-mTOR	3356293	8.96419	1
	72h TOB1	p-mTOR	1826802	5.43353	0.606137
	72h Control	β-actin	374411
	72h TOB1	β-actin	336209
